# Supplementary material for: Photovoltaic properties of 3,3′-(ethane-1,2-diylidene)-bis(indolin-2-one) based conjugated polymers
Source: Royal Society of Chemistry journal article supplement (doi:10.1039/c5ra23693b), 2016-01-01
Supplement: c5ra23693b1.pdf [file c5ra23693b1.pdf]

## Supporting Information

### Photovoltaic properties of 3,3'-(ethane-1,2-diylidene)-bis(indolin-2-one) based conjugated polymers

Jian Wu<sup>a</sup>, Yingying Fu<sup>b</sup>, Hao Huang<sup>a</sup>, Shengxia Li<sup>a</sup> and Zhiyuan Xie<sup>b,\*\*</sup> and Qing Zhang<sup>a,\*</sup>

<sup>a</sup>*Shanghai Key Lab of Polymer and Electrical Insulation, School of Chemistry and Chemical Engineering, Shanghai Jiaotong University, Shanghai 200240, P. R. China*

<sup>b</sup>*State Key Laboratory of Polymer Physics and Chemistry, Changchun Institute of Applied Chemistry, Chinese Academy of Science, Changchun, 130022, China.*

## 1. NMR spectra

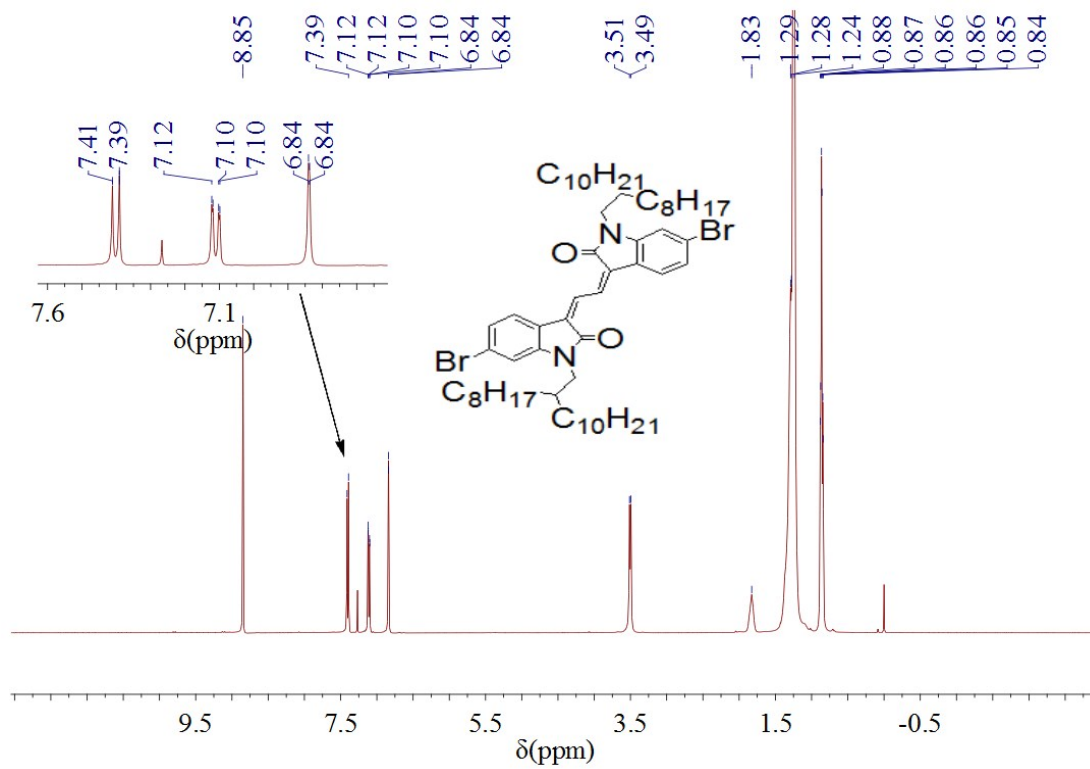

Fig. S1.  $^1\text{H}$  NMR spectrum of compound **M**

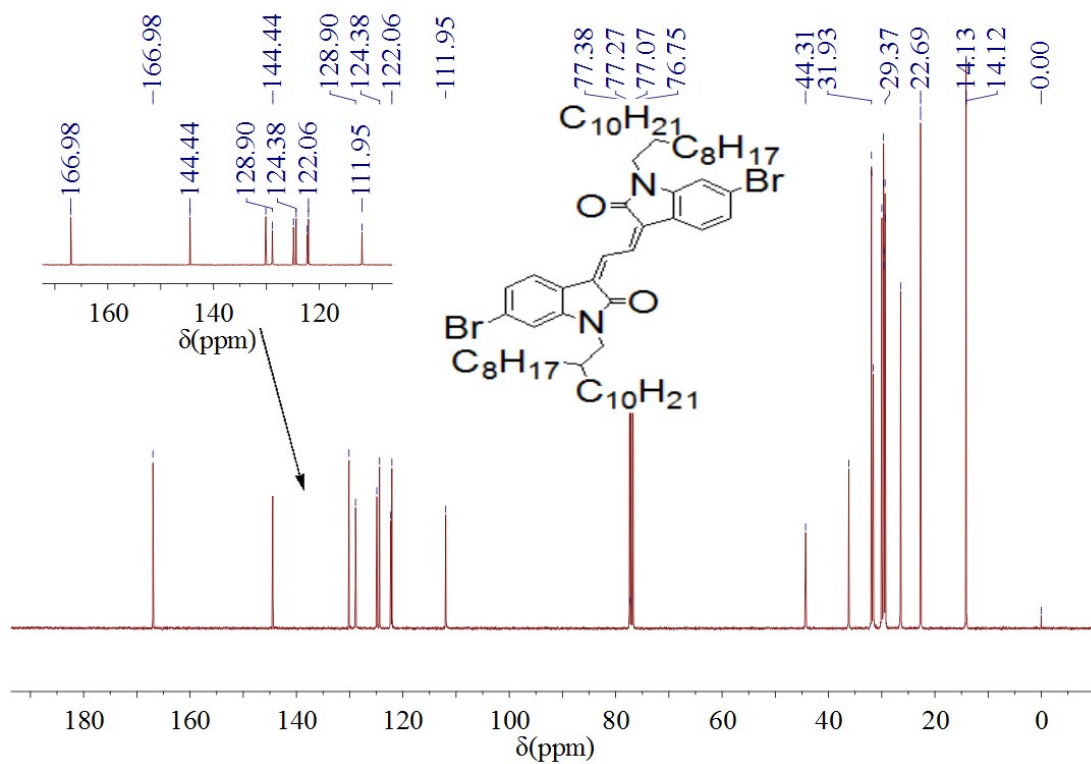

**Fig. S2.**  $^{13}\text{C}$  NMR spectrum of compound **M**

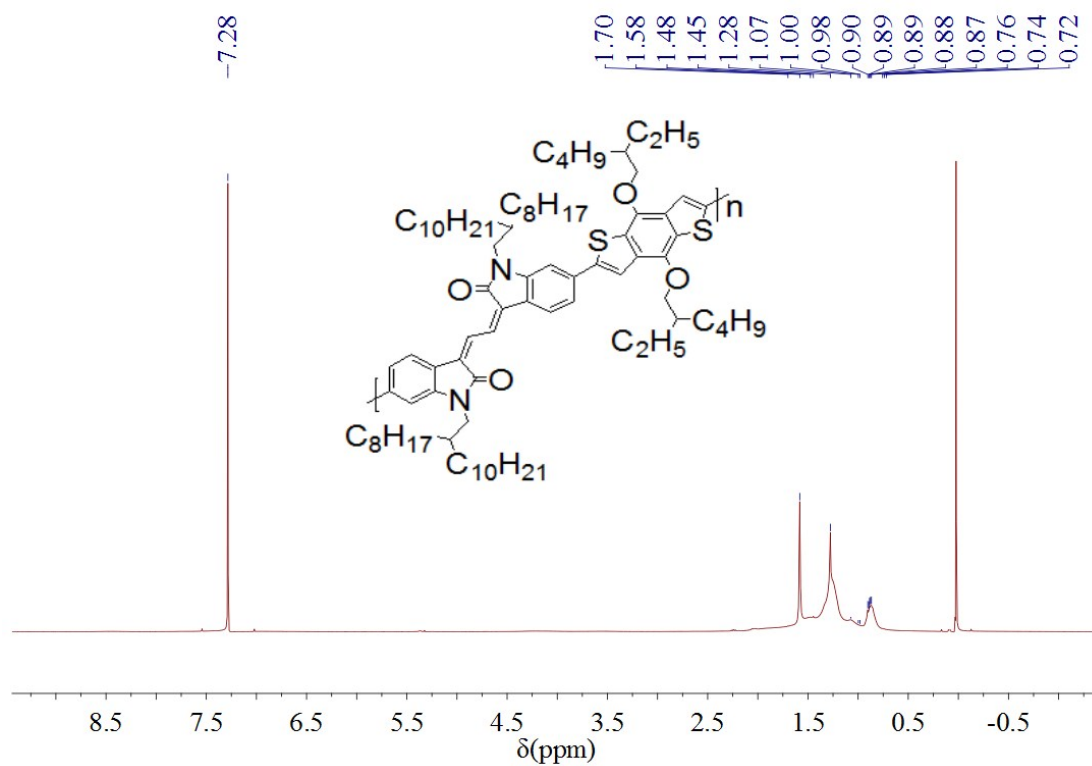

**Fig. S3.**  $^1\text{H}$  NMR spectrum of **PEBI-BDTO**

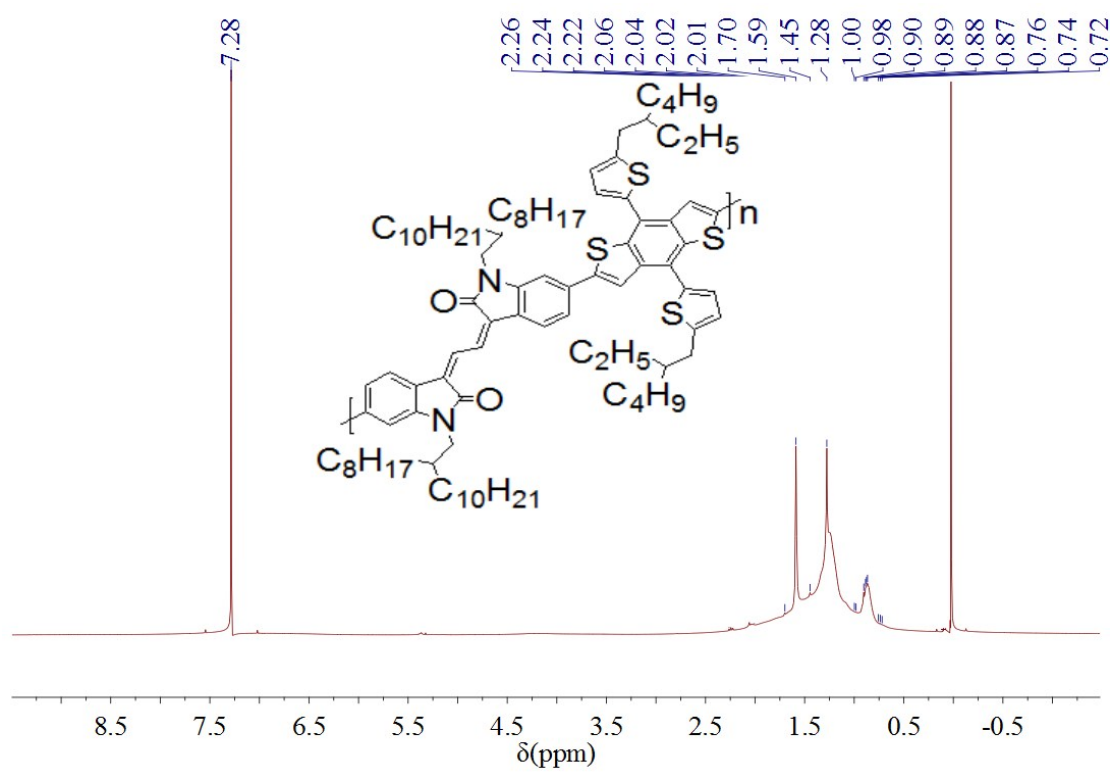

Fig. S4.  $^1\text{H}$  NMR spectrum of PEBI-BDT

## 2. TGA and DSC thermograms of polymers

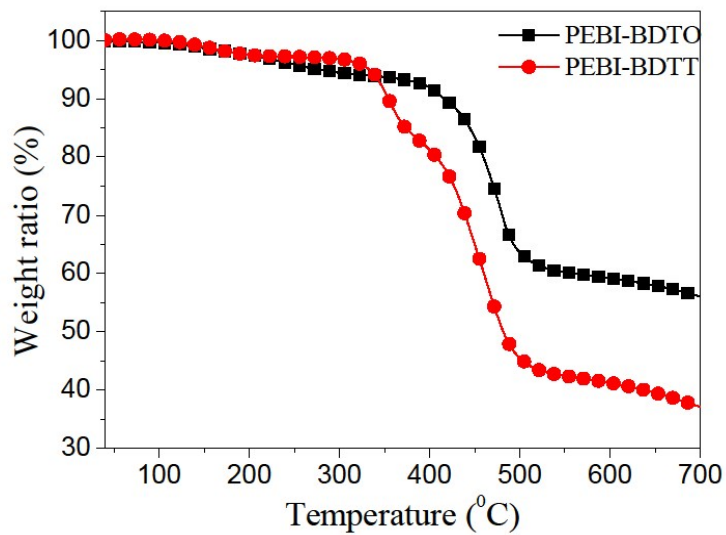

**Fig. S5.** TGA curves of polymers.

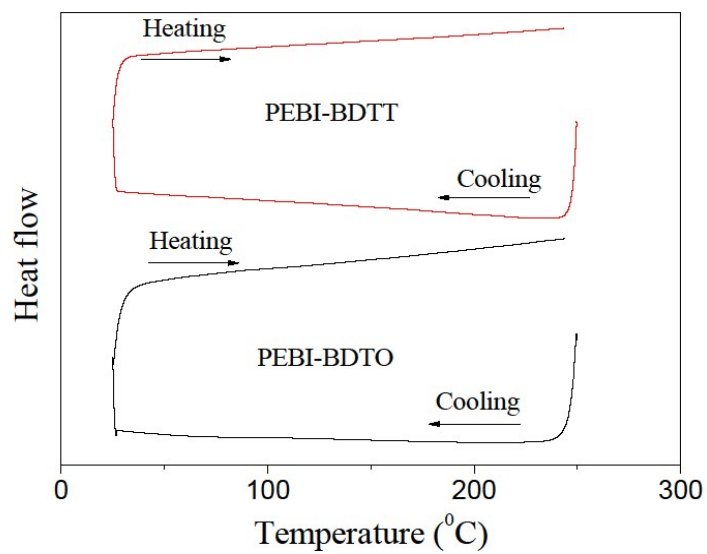

**Fig. S6.** DSC thermograms of polymers

The first cooling and the second heating scan of polymers with temperature ramp of 20 °C/min.

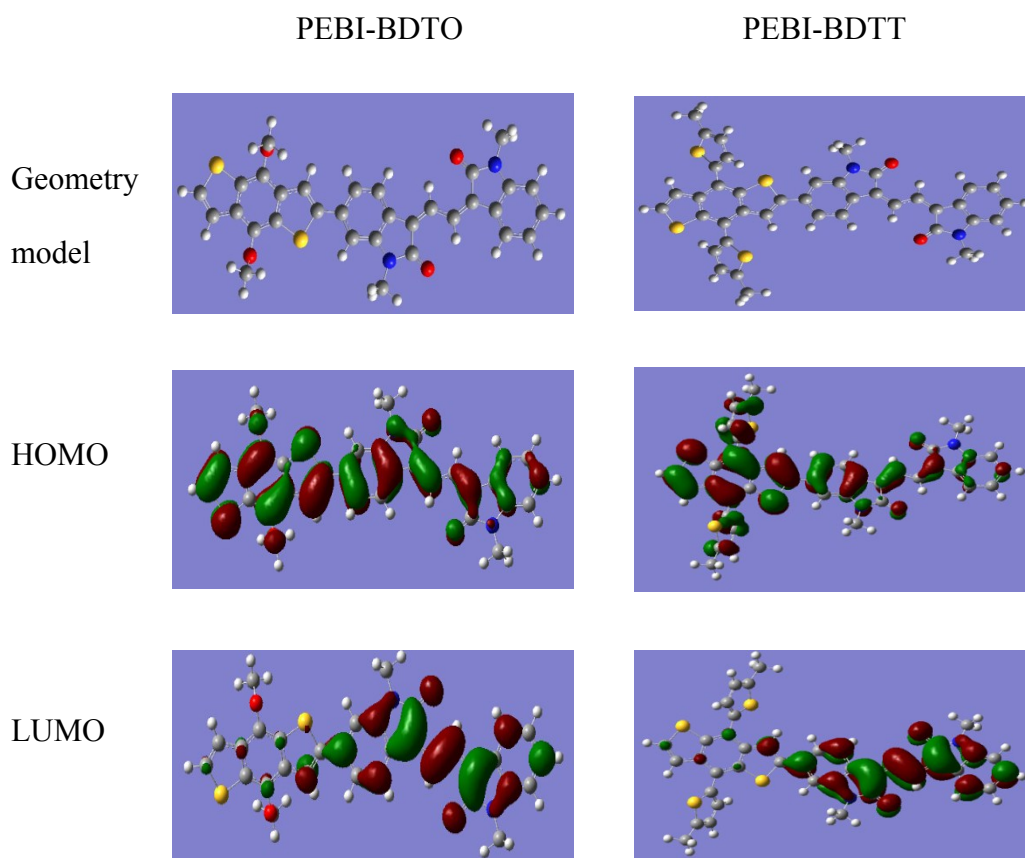

**Fig. S7.** The geometry, the LUMO and HOMO orbital of model **PEBI-BDTO** (left) and **PEBI-BDTT** (right) by DFT calculations with the B3LYP/6-31G\*\* basis set.

## 1. Polymer solar cell devices performances

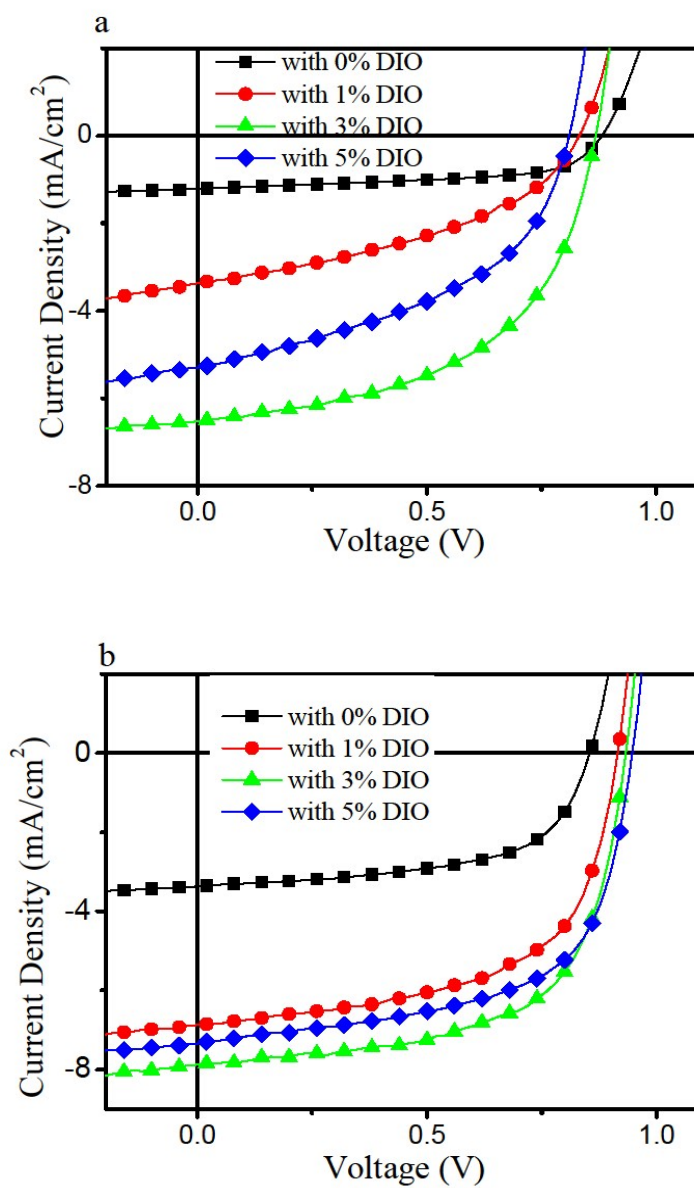

**Fig. S8.**  $I-V$  curves of PSC devices processed with different amount of DIO (a) PEBI-BDTO:PC<sub>71</sub>BM and (b) PEBI-BDTT:PC<sub>71</sub>BM



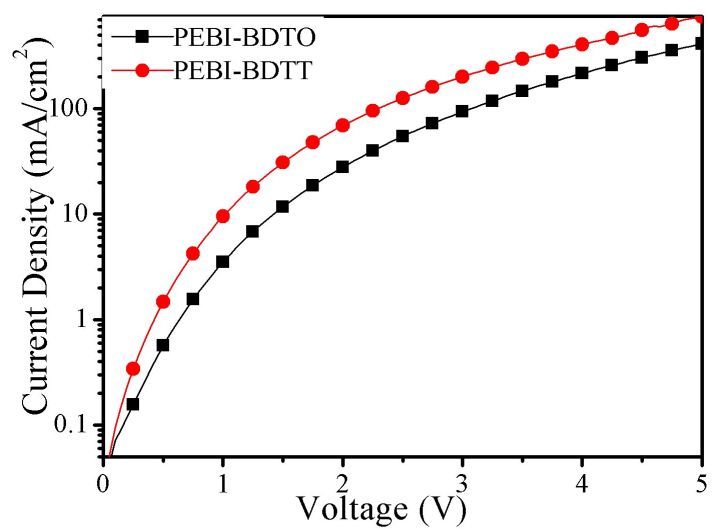

**Fig. S9.** *I-V* characteristics of **PEBI-BDTO** and **PEBI-BDTT** hole-only devices.

**Table.S1.** The solar cell performances with different amount of DIO

| Active layer (w/w)             |       | DIO(%) | $J_{sc}$              | Voc  | FF   | PCE (%)   |
|--------------------------------|-------|--------|-----------------------|------|------|-----------|
|                                |       |        | (mA/cm <sup>2</sup> ) | (V)  |      |           |
| Polymer:PC <sub>71</sub> BM    | D:A   |        |                       |      |      |           |
| PEBI-BDTO: PC <sub>71</sub> BM | 1:2   | 0      | 1.21                  | 0.88 | 58.7 | 2.39±0.08 |
|                                | 1:2   | 1      | 3.37                  | 0.84 | 41.2 | 2.54±0.13 |
|                                | 1:2   | 3      | 6.53                  | 0.86 | 53.4 | 2.74±0.06 |
|                                | 1:2   | 5      | 5.48                  | 0.82 | 51.7 | 3.00±0.12 |
| PEBI-BDTT: PC <sub>71</sub> BM | 1:1.5 | 0      | 3.37                  | 0.86 | 58.8 | 1.70±0.17 |
|                                | 1:1.5 | 1      | 6.87                  | 0.92 | 58.5 | 3.70±0.11 |
|                                | 1:1.5 | 3      | 7.88                  | 0.94 | 62.1 | 4.59±0.15 |
|                                | 1:1.5 | 5      | 7.34                  | 0.94 | 61.4 | 4.23±0.07 |
